# Supplementary material
Source: Springer Nature journal article supplement (https://www.springermedizin.de/resource/supplementary/12967_2009_355_MOESM5_ESM.pdf/9576290)

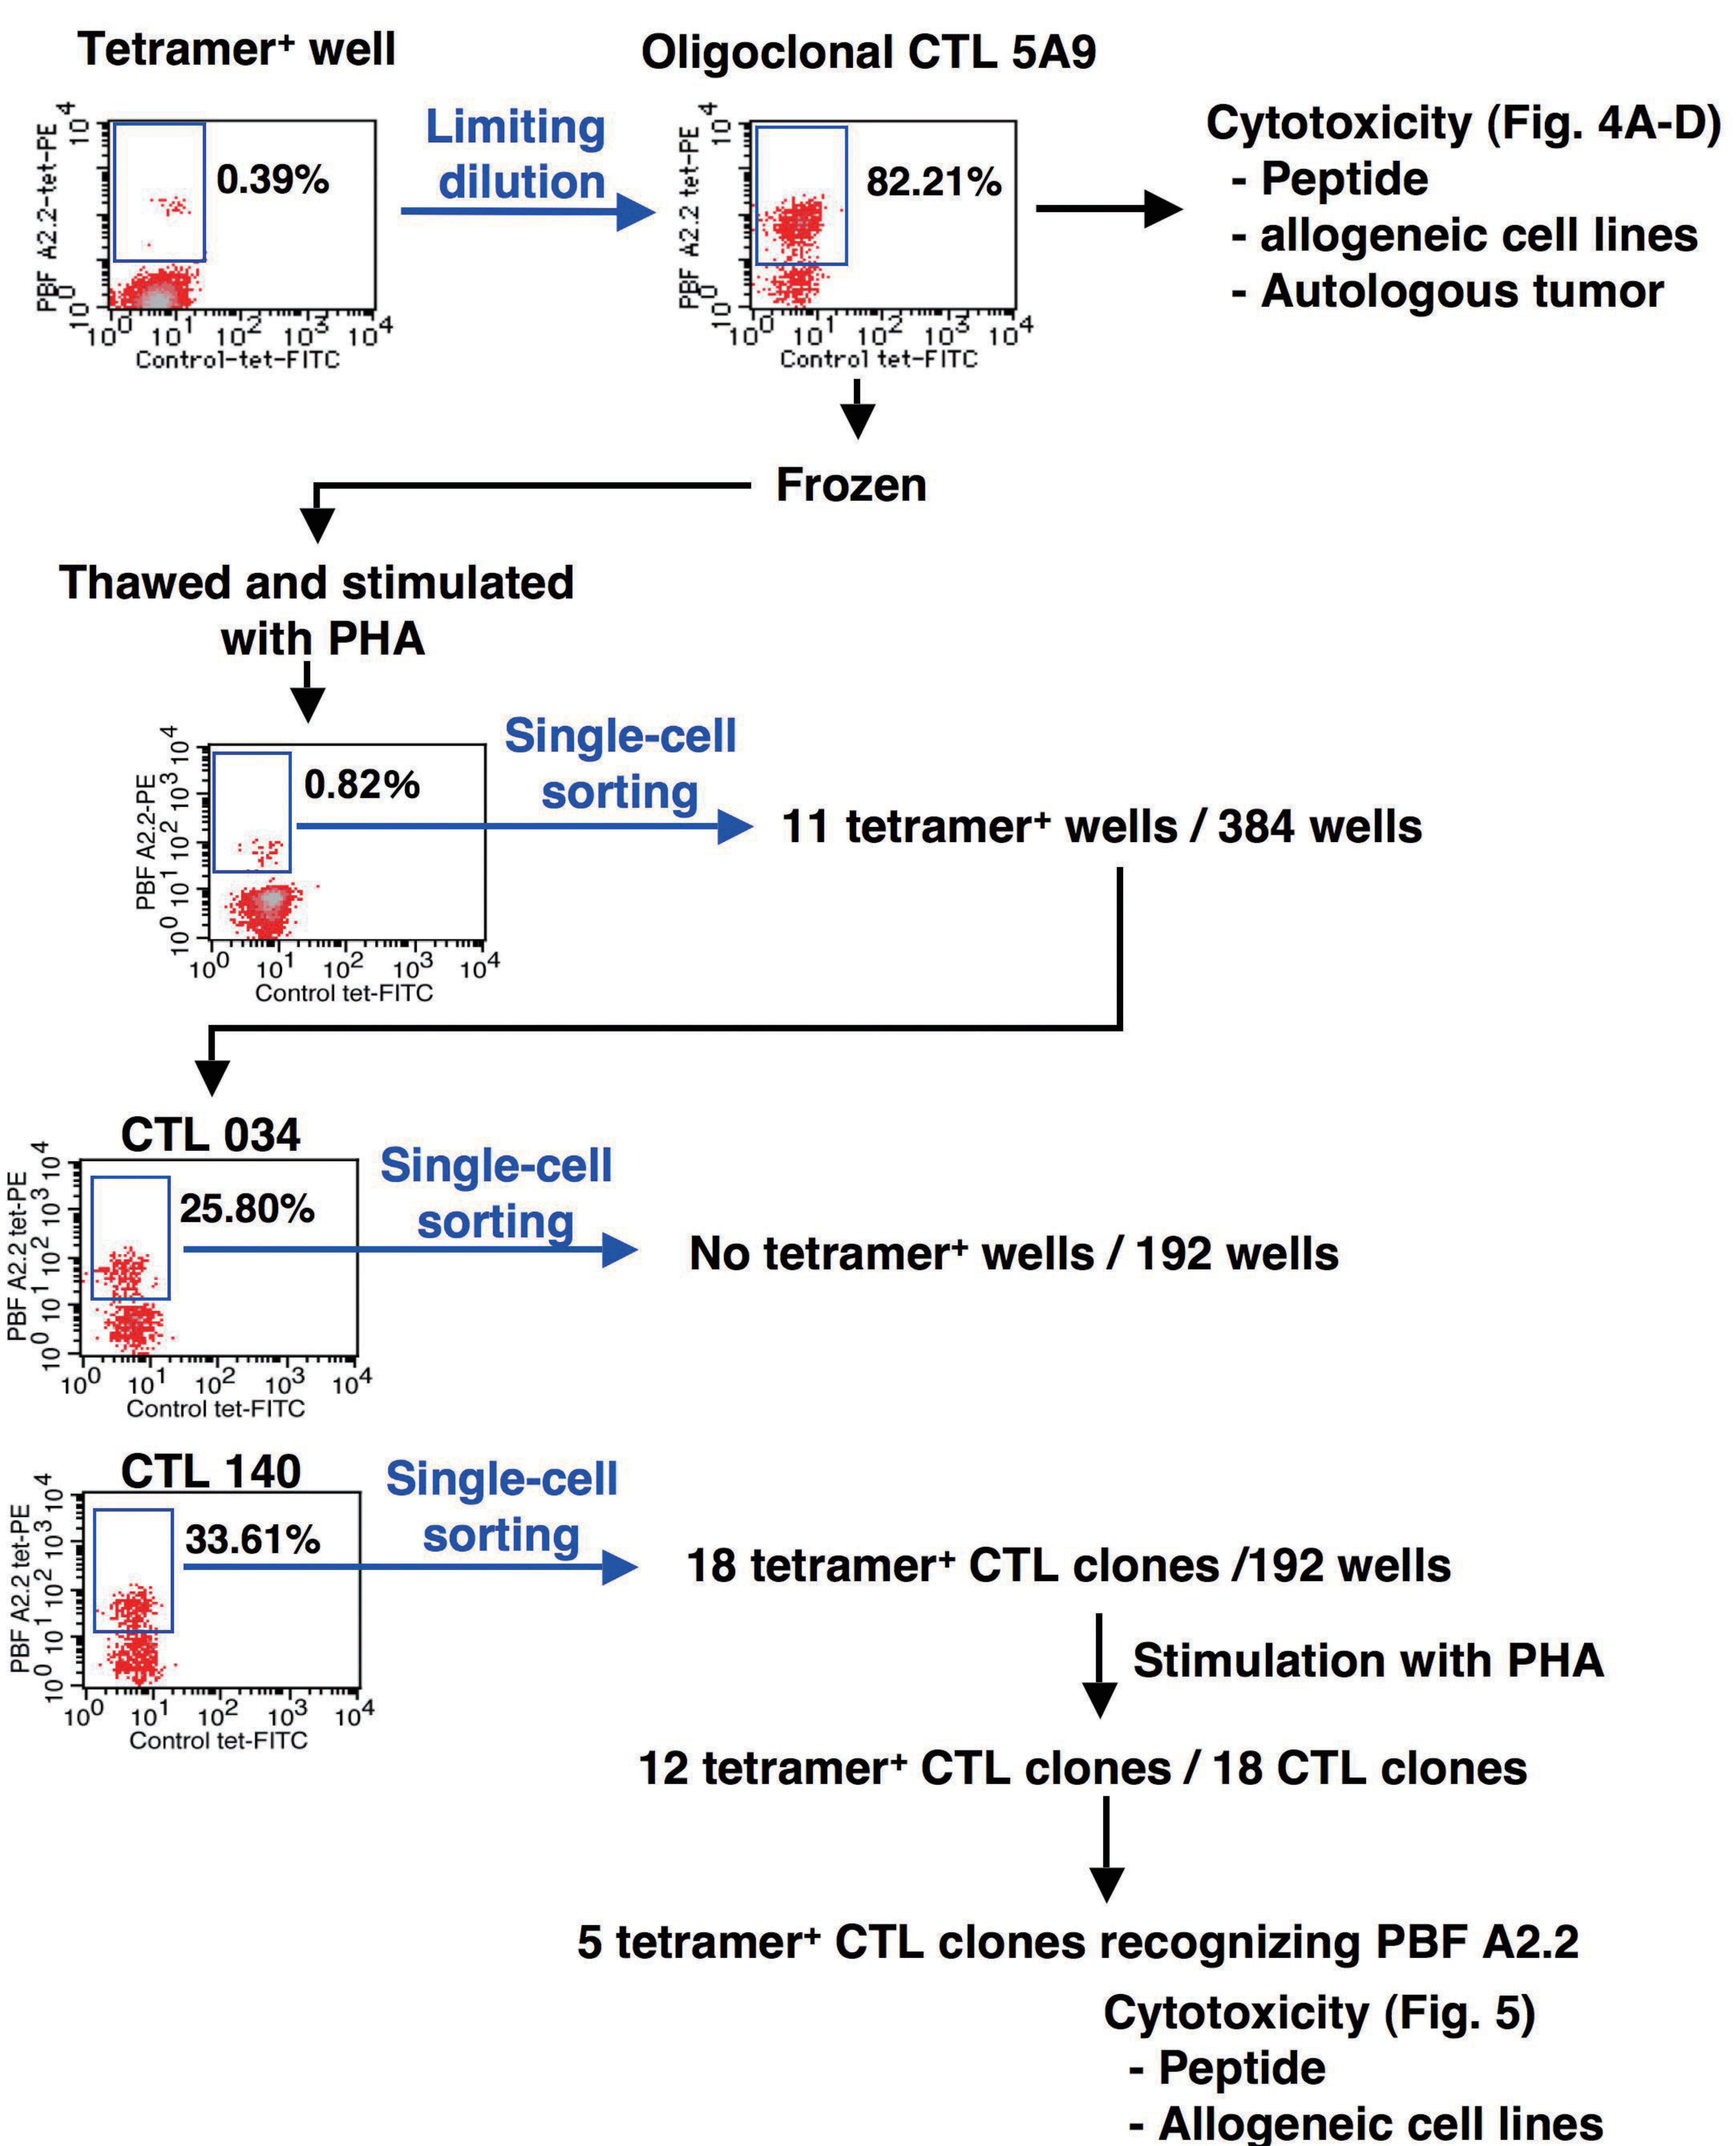

Supplement: MOESM5 [file 9576290]
